# Supplementary material for: Rare Differential Diagnosis of Dyspnea: Extramedullary Plasmocytoma (EMP) of the Larynx—Case Report and Review of the Latest Literature of Laryngeal EMP and Laryngeal Involvement of Multiple Myeloma
Source: Hindawi journal article supplement (doi:10.1155/2019/5654014), 2019-04-17
Supplement: f1 [file 5654014.f1.pdf]

|                        | Alherabi (20)                                                                     | Allegra (21)                                                                                           | Flore (22)                                                                                        | Ghatak (23)                                                                                                     | Haser (24)                                              | Mitchell (3)                                                              | Nochikattil (25)                                                                               | Oral (26)                                       | Wang (27)                                                                                                                             | Xing (8)                                                                                      |
|------------------------|-----------------------------------------------------------------------------------|--------------------------------------------------------------------------------------------------------|---------------------------------------------------------------------------------------------------|-----------------------------------------------------------------------------------------------------------------|---------------------------------------------------------|---------------------------------------------------------------------------|------------------------------------------------------------------------------------------------|-------------------------------------------------|---------------------------------------------------------------------------------------------------------------------------------------|-----------------------------------------------------------------------------------------------|
| <b>Age</b>             | 77                                                                                | 68                                                                                                     |                                                                                                   | 29                                                                                                              |                                                         | 63                                                                        | 44                                                                                             | 43                                              | 43                                                                                                                                    | 47                                                                                            |
| <b>Sex</b>             | M                                                                                 | M                                                                                                      | M                                                                                                 | F                                                                                                               | ?                                                       | M                                                                         | F                                                                                              | M                                               | M                                                                                                                                     | F                                                                                             |
| <b>Symptoms</b>        | dysphagia                                                                         | dyspnea, dysphagia, dysphonia                                                                          | dyspnea                                                                                           | hoarseness, dysphagia, intermittent respiratory difficulty                                                      | ?                                                       | hoarseness, neck mass                                                     | hoarseness, stridor                                                                            | pain of the left leg, no symptoms of the larynx | hoarseness, dyspnea                                                                                                                   | hoarseness                                                                                    |
| <b>Anatomical Site</b> | diffuse supraglottic swelling with ill-defined epiglottic and hypopharyngeal mass | lesion involving the right glottis and right vestibular (false) vocal fold, constriction of the airway | arising from the cricoid, thinning and expansion of the cartilage laminae without mucosal lesions | fleshy mass involving the posterior third of the true vocal cords, encroaching on the ventricle and false cords | cricoid cartilage with solitary plasmacytoma of the rib | bulging left false vocal fold under normal mucosa                         | mucosa covered smooth swelling over left arytenoid, aryepiglottic fold and left piriform sinus | thyroid cartilage and bones                     | swelling of the arytenoid, vocal cord, laryngeal ventricle and ventricular band                                                       | 2x2cm reddish smooth mass overlying the left hemilarynx, the base from the aryepiglottic fold |
| <b>pre-known MM?</b>   | no                                                                                | no                                                                                                     | yes                                                                                               | no                                                                                                              | no                                                      | yes                                                                       | no                                                                                             | no                                              | no                                                                                                                                    | no                                                                                            |
| <b>Treatment</b>       | dexamethasone iv and nasogastric tube feeding, further therapy alio loco          | 6 cycles of chemotherapy (bortezomib, thalidomide + dexamethasone)                                     | radiation therapy + peroral steroids                                                              | tracheostomy, radiotherapy                                                                                      | ?                                                       | chemotherapy with lenalidomide + external beam radiotherapy to the larynx | referred to oncology                                                                           | ?                                               | tracheostomy, complete excision of the invaded tissue, radiotherapy refused                                                           | tracheostomy, complete excision via lateral neck incision, postoperative radiotherapy         |
| <b>Response</b>        | good response                                                                     | partial remission                                                                                      | good response                                                                                     | good response                                                                                                   | ?                                                       | good response                                                             | ?                                                                                              | ?                                               | tumor recurrence after 1 year → operation, 2nd recurrence with osseous masses → chemotherapy with melphalan, prednisone + thalidomide | neck abscess 6 months after therapy, no recurrence                                            |
| <b>Follow-up</b>       | no                                                                                | yes, interferone and steroid                                                                           | ?                                                                                                 | yes                                                                                                             | ?                                                       | yes                                                                       | ?                                                                                              | ?                                               | yes                                                                                                                                   | yes                                                                                           |
